# Supplementary material
Source: PubMed Central journal article supplement (PMC4144386)
Supplement: Supp_Table2.pdf [file Supp_Table2.pdf]

SUPPLEMENTARY TABLE S2. DEMOGRAPHIC, SOCIOECONOMIC, AND CLINICAL PREDICTORS FOR 37 mTBI PATIENTS WITHOUT NEUROPSYCHIATRIC OR SUBSTANCE ABUSE HISTORY AND 50 CONTROL SUBJECTS

|                                                           | CT/MRI-negative mTBI<br>(no acute traumatic<br>intracranial abnormality<br>or depressed skull<br>fracture on CT and/or<br>conventional<br>MRI) (20 subjects) | CT/MRI-positive mTBI<br>(17 subjects) (acute<br>traumatic intracranial<br>abnormality and/or<br>depressed skull<br>fracture on CT<br>and/or conventional MRI) | Controls (50<br>subjects) | Analysis for group<br>differences among<br>CT/MRI negative<br>mTBI, CT/MRI<br>positive mTBI, and<br>control subjects |
|-----------------------------------------------------------|--------------------------------------------------------------------------------------------------------------------------------------------------------------|---------------------------------------------------------------------------------------------------------------------------------------------------------------|---------------------------|----------------------------------------------------------------------------------------------------------------------|
| <b>Demographic and socioeconomic</b>                      |                                                                                                                                                              |                                                                                                                                                               |                           |                                                                                                                      |
| Age (years, mean $\pm$ standard deviation)                | 30.9 $\pm$ 8.8                                                                                                                                               | 30.6 $\pm$ 10.2                                                                                                                                               | 28.7 $\pm$ 9.2            | $F(2,84)=0.5$ ;<br>$p=0.61$ ANOVA                                                                                    |
| Education (years, mean $\pm$ standard deviation)          | 16.1 $\pm$ 2.2                                                                                                                                               | 14.9 $\pm$ 2.2                                                                                                                                                | 15.7 $\pm$ 1.6            | $F(2,70)=1.6$ ;<br>$p=0.20$                                                                                          |
| Gender: male/female (% male)                              | 10/10 (50%)                                                                                                                                                  | 10/7 (59%)                                                                                                                                                    | 32/18 (64%)               | $\chi^2(2; n=87)=1.2$ ;<br>$p=0.58$ $\chi^2$ test for independence                                                   |
| Unemployed <sup>a</sup> : yes/no (% yes)                  | 2/18 (10%)                                                                                                                                                   | 3/13 (19%)                                                                                                                                                    | Unknown                   | $p=0.64$ Fisher's exact test                                                                                         |
| Handedness <sup>b</sup> (right/left/ambidextrous)         | 18/2/0                                                                                                                                                       | 15/1/1                                                                                                                                                        | 48/1/0                    | $p=0.11$                                                                                                             |
| <b>Clinical</b>                                           |                                                                                                                                                              |                                                                                                                                                               |                           |                                                                                                                      |
| GCS (15/14/13)                                            | 14/5/1                                                                                                                                                       | 12/5/0                                                                                                                                                        | N/A                       | $p=0.92$ Fisher's exact test                                                                                         |
| PTA (yes/no) (% yes)                                      | 16/4 (80%)                                                                                                                                                   | 13/4 (76%)                                                                                                                                                    | N/A                       | $p=1.0$                                                                                                              |
| Previous TBI with LOC up to 5 minutes<br>(yes/no) (% yes) | 3/17 (15%) <sup>d</sup>                                                                                                                                      | 2/15 (12%) <sup>d</sup>                                                                                                                                       | 0/50 (0%) <sup>e</sup>    | $p=0.02$                                                                                                             |
| PTA duration                                              | None<br><1 min<br>1–29 min<br>30–59 min<br>1–24 h                                                                                                            | None<br><1 min<br>1–29 min<br>30–59 min<br>1–24 h                                                                                                             | 4<br>1<br>6<br>2<br>3     | $p=0.65$ Mann-Whitney's U test                                                                                       |
| LOC: yes, up to 30 minutes' duration/no (% yes)           | 15/5 (75%)                                                                                                                                                   | 12/5 (71%)                                                                                                                                                    | N/A                       | $\chi^2(1; n=37)=0.09$ ;<br>$p=1.0$ $\chi^2$ test for independence                                                   |

Gray shaded box denotes statistically significant difference at  $p < 0.05$ .

<sup>a</sup>One CT/MRI-positive mTBI patient with unknown employment status was not included in this analysis.

<sup>b</sup>One control with unknown handedness was not included in this analysis.

<sup>c</sup>One CT/MRI-positive mTBI patient with PTA less than 24 h, but not otherwise specified, was not included in this analysis.

<sup>d,e</sup>Each superscript denotes a subset of participants whose proportions do not significantly differ from each other at  $p < 0.05$  by Pearson's  $\chi^2$  test (or Fisher's exact test when expected cell count  $< 5$ ).  
CT, computed tomography; MRI, magnetic resonance imaging; mTBI, mild traumatic brain injury; ANOVA, analysis of variance; GCS, Glasgow Coma Scale; PTA, post-traumatic amnesia; LOC, loss of consciousness.
