# Supplementary material
Source: PubMed Central journal article supplement (PMC4144386)
Supplement: Supp_Table3.pdf [file Supp_Table3.pdf]

SUPPLEMENTARY TABLE S3. GROUP DIFFERENCES IN 3- AND 6-MONTH OUTCOME MEASURES BETWEEN 17 CT/MRI-POSITIVE mTBI AND 20 CT/MRI-NEGATIVE mTBI PATIENTS WITHOUT NEUROPSYCHIATRIC OR SUBSTANCE ABUSE HISTORY

|                                          | <i>CT/MRI-negative<br/>mTBI (20 subjects)</i> |                               | <i>CT/MRI-positive<br/>mTBI (17 subjects)</i> |                               | <i>Analysis for group differences between<br/>CT/MRI-negative and CT/MRI-positive mTBI</i> |                     |
|------------------------------------------|-----------------------------------------------|-------------------------------|-----------------------------------------------|-------------------------------|--------------------------------------------------------------------------------------------|---------------------|
| <b>3-month outcome measure</b>           |                                               |                               |                                               |                               |                                                                                            |                     |
|                                          | <i>Score</i>                                  | <i>Number<br/>of patients</i> | <i>Score</i>                                  | <i>Number<br/>of patients</i> |                                                                                            |                     |
| 3-month GOS-E <sup>a</sup>               | 5                                             | 1                             | 5                                             | 1                             | U = 77.5; z = -1.97;<br>p = 0.048*                                                         | Mann-Whitney U test |
|                                          | 6                                             | 2                             | 6                                             | 6                             |                                                                                            |                     |
|                                          | 7                                             | 4                             | 7                                             | 3                             |                                                                                            |                     |
|                                          | 8                                             | 11                            | 8                                             | 4                             |                                                                                            |                     |
| <b>6-month outcome measures</b>          |                                               |                               |                                               |                               |                                                                                            |                     |
| 6-month GOS-E <sup>b</sup>               |                                               |                               |                                               |                               |                                                                                            |                     |
|                                          | 5                                             | 1                             | 5                                             | 0                             | U = 71.0; z = -1.7;<br>p = 0.095                                                           |                     |
|                                          | 6                                             | 2                             | 6                                             | 5                             |                                                                                            |                     |
|                                          | 7                                             | 5                             | 7                                             | 4                             |                                                                                            |                     |
|                                          | 8                                             | 10                            | 8                                             | 3                             |                                                                                            |                     |
| RPQ-3 <sup>b</sup><br>Median (25%, 75%)  | 1 (0, 2)                                      |                               | 2 (0, 4.3)                                    |                               | U = 79.0; z = -1.3;<br>p = 0.20                                                            | Mann-Whitney U test |
| RPQ-13 <sup>b</sup><br>Median (25%, 75%) | 6.5 (2.3, 7.8)                                |                               | 18.5 (9.8, 20.3)                              |                               | U = 36.5; z = -3.0;<br>p = 0.002 <sup>†</sup>                                              |                     |
| CVLT-II scaled score <sup>c</sup>        | 55 ± 9                                        |                               | 55 ± 10                                       |                               | t(23) = -0.003;<br>p = 1.0                                                                 | Two-tailed t-test   |
| WAIS-IV PSI <sup>c</sup><br>percentile   | 57% ± 25%                                     |                               | 68% ± 25%                                     |                               | t(25) = 0.53;<br>p = 0.60                                                                  |                     |
| TMT A <sup>d</sup>                       |                                               |                               |                                               |                               |                                                                                            |                     |
| • Time (sec)                             | 28 ± 9                                        |                               | 31 ± 9                                        |                               | t(25) = 0.75;<br>p = 0.46                                                                  | Two-tailed t-test   |
| • Time (z-score)                         | 0.48 ± 1.30                                   |                               | 0.81 ± 1.34                                   |                               | t(25) = 0.65;<br>p = 0.52                                                                  |                     |
| • TMT A > 2 SDs above mean               | Yes                                           | 3                             | Yes                                           | 2                             | U = 87.0; z = -0.22;<br>p = 1.0                                                            | Mann-Whitney U test |
|                                          | No                                            | 12                            | No                                            | 10                            |                                                                                            |                     |
| TMT B <sup>d</sup>                       |                                               |                               |                                               |                               |                                                                                            |                     |
| • Time (sec)                             | 64 ± 17                                       |                               | 69 ± 32                                       |                               | t(25) = 0.53;<br>p = 0.60                                                                  | Two-tailed t-test   |
| • Time (z-score)                         | 0.89 ± 1.29                                   |                               | 1.28 ± 2.34                                   |                               | t(25) = 0.52;<br>p = 0.61                                                                  |                     |
| • TMT B > 2 SDs above mean               | Yes                                           | 3                             | Yes                                           | 4                             | U = 78.0; Z = -0.77;<br>p = 0.66                                                           | Mann-Whitney U test |
|                                          | No                                            | 12                            | No                                            | 8                             |                                                                                            |                     |

<sup>a</sup>Two CT/MRI-negative mTBI and 3 CT/MRI-positive mTBI patients did not complete 3-month GOS-E evaluation.

<sup>b</sup>Two CT/MRI-negative mTBI and 5 CT/MRI-positive mTBI patients did not complete 6-month GOS-E, RPQ-3, or RPQ-13.

<sup>c</sup>Six CT/MRI-negative mTBI and 6 CT/MRI-positive mTBI patients did not complete 6-month CVLT-II or WAIS-IV.

<sup>d</sup>Five CT/MRI-negative mTBI and 5 CT/MRI-positive mTBI patients did not complete 6-month TMT A or TMT B.

\*p < 0.05 (light-gray boxes); <sup>†</sup>p < 0.01 (medium-gray boxes).

CT, computed tomography; MRI, magnetic resonance imaging; mTBI, mild traumatic brain injury; GOS-E, Glasgow Outcome Scale-Extended; RPQ, Rivermead Postconcussion Symptoms Questionnaire; CVLT-II, California Verbal Learning Test-Second Edition; WAIS-IV PSI, Wechsler Adult Intelligence Scale-Fourth Edition, Processing Speed Index; TMT, Trail Making Test; SD, standard deviation.
